# Supplementary material for: Spirulina maxima Derived Pectin Nanoparticles Enhance the Immunomodulation, Stress Tolerance, and Wound Healing in Zebrafish
Source: PubMed Central journal article supplement (PMC7695216; doi:10.3390/md18110556), 2020-11-07
Supplement: marinedrugs-18-00556-s001.pdf [file marinedrugs-18-00556-s001.pdf]

**Supplementary table 1.** Gene specific primers used in this study.

| Gene name                                                 | Accession number  | Primer name                          | Primer sequence (5'-3')                               |
|-----------------------------------------------------------|-------------------|--------------------------------------|-------------------------------------------------------|
| <b>Zebrafish genes</b>                                    |                   |                                      |                                                       |
| Toll like receptor 2 ( <i>tlr2</i> )                      | NM_212812.1       | tlr2-F<br>tlr2-R                     | TCTCCGCTCTGGTTTCAC<br>GGTCCCACAGTTGAGTATG             |
| Toll like receptor 4b ( <i>tlr4b</i> )                    | AY388400.1        | tlr4b-F<br>tlr4b-R                   | GGAATAATGGGCAGCCGTAAG<br>AGCGACACCAACTATCAATG         |
| Toll like receptor 5 ( <i>tlr5b</i> )                     | BC163185.1        | tlr5b-F<br>tlr5b-R                   | GAAACATTCACCCCTGGCACA<br>CTACAACCAGCACCACCAGAATG      |
| <i>crel</i>                                               | AY163837          | crel-F<br>crel-R                     | ACTACAGCTCCCAACAGCCTCAAA<br>AAACTGGTAGCCCGTTGCTAGTGA  |
| Interleukin-1 $\beta$ ( <i>il1<math>\beta</math></i> )    | AY340959.1        | il1 $\beta$ -F<br>il1 $\beta$ -R     | TCAAACCCCAATCCACAGAG<br>TCACTTCACGCTCTTGGATG          |
| Tumor necrosis factor- $\alpha$ ( <i>tnfa</i> )           | AY427649          | tnfa-F<br>tnfa-R                     | AGAAGGAGAGTTGCCTTTACCGCT<br>AACACCCTCCATACACCCGACTTT  |
| Interleukin-6 ( <i>il6</i> )                              | JN698962.1        | il6-F<br>il6-R                       | TCAACTTCTCCAGCGTGATG<br>TCTTTCCCTCTTTTCTCCTG          |
| Interleukin-10 ( <i>il10</i> )                            | AY887900.1        | il10-F<br>il10-R                     | CCCTATGGATGTCACGTCATG<br>CATATCCCGCTTGAGTTCCTG        |
| Chemokine ligand 8a ( <i>cxcl8a</i> )                     | XM_009306855.2    | cxcl8a-R<br>cxcl8a-R                 | CTTCCCTCCAAGCCACAC<br>GATCCGGGCATTCATGG               |
| Chemokine ligand 18b ( <i>cxcl18b</i> )                   | NM_001115060      | cxcl18b-F<br>cxcl18b-R               | CTGCTGCTGCCGTAGTTTA<br>TCAACTTTGTGCGAGTTTGG           |
| CC-chemokine ( <i>ccl34a.4</i> )                          | BC162421.1        | ccl34 a.4-F<br>ccl34 a.4-R           | TGCAGCTCAACCAGAAGATG<br>CTTTGACGCATGGAGGATTT          |
| Chemokines CCL-C24 ( <i>ccl34b.4</i> )                    | NP_001108521      | ccl34b.4-F<br>ccl34b.4-R             | TCGAGTTGGAGTAAACATGTG<br>GTACCTTTCCTTCTCTGCGTAG       |
| Defensin, beta-like1 ( <i>defb11</i> )                    | NM_001081553.1    | defb11-F<br>defb11-R                 | CTGCTTGTCTTGTGCTACT<br>GCAAACACACTCCTTGTCTG           |
| Hepcidin ( <i>hamp</i> )                                  | NM_205583.2       | hamp-F<br>hamp-R                     | CATACAGCAGGTACAGGATGAG<br>GAGGGTCTGTTAGTCTGTGTTT      |
| Cathepsin D ( <i>ctsd</i> )                               | NM_131710.2       | ctsd-F<br>ctsd-R                     | GAAACCCTCAGACGAACACTAAG<br>GGGAAGCCCAGGTTGTATTT       |
| Lysozyme-C ( <i>lyz</i> )                                 | AF402599          | lyz-F<br>lyz-R                       | AAGCAGGTTTAAGACCCACCGAGT<br>AAGTCTGAACAGGCCACTTTGCAC  |
| Alkaline phosphatase ( <i>alp</i> )                       | JX847415.1        | alp-F<br>alp-R                       | GGTCGTACAACCTGTTATCCTC<br>GAGCAAAGTCCCTCCAGTAATC      |
| Mucin 2.1 ( <i>muc2.1</i> )                               | NC_007136.7       | muc 2.1-F<br>muc 2.1-R               | AATATGCCTTGCGGAACAAC<br>GTGCTGAGGTTGCAGAATGA          |
| Mucin 5.1 ( <i>muc5.1</i> )                               | XM_009297795.1    | muc 5.1-F<br>muc 5.1-R               | TGGCAACTTGGCTGATGATA<br>TCGTACACCGACCAGTAGA           |
| Mucin 5.2 ( <i>muc5.2</i> )                               | XM_009297793.1    | muc 5.2-F<br>muc 5.2-R               | GGTGTCTGTTCCGATCAATC<br>TCATCCTTGTGCGCAATTGA          |
| Mucin 5.3 ( <i>muc5.3</i> )                               | ENSDARG0000089847 | muc 5.3-F<br>muc 5.3-R               | GGGGAAAACACTACACCAGCAA<br>TGTGAATTCTGTGCCAGAGC        |
| Heat shock protein ( <i>hsp70</i> )                       | AB062116.1        | hsp70-F<br>hsp70-R                   | CATGGTCTGGTGAAGATGAA<br>GTCTGTGGACTCGTTGAAATA         |
| Heat shock protein ( <i>hsp90ab1</i> )                    | NM_131310.3       | hsp90ab1-F<br>hsp90ab1-R             | GAAGAGGAGAAGGCAGAGAAAAG<br>CGAGCCGACATCTTCAATCT       |
| Transforming growth factor, $\beta$ 1 ( <i>tgfb1</i> )    | XM_687246         | tgfb1-F<br>tgfb1-R                   | CCCAAGGAACCAGAAGTAGAAG<br>GGATCTTCTATGGTGTGCTGAA      |
| Matrix metalloproteinase 9 ( <i>mmp9</i> )                | AY151254          | mmp9-F<br>mmp9-R                     | TTTCCCTGATCGTGATAC<br>GGGAAACCCTCCACGTATTT            |
| Matrix metalloproteinase 13 ( <i>mmp13</i> )              | AF506756          | mmp13-F<br>mmp13-R                   | GAGAAGGTTTGGGCTCTCTATG<br>TGAGTTGCTGTCTTCTGTAG        |
| Tissue inhibitor of metalloproteinase 2 ( <i>timp2b</i> ) | BC056534          | timp2b-F<br><br>timp2b-R             | GCGTTATGTGGAGTCAGTCTT<br><br>CTCGATGTAGTCACACAGGTTTAT |
| Super oxide dismutase ( <i>sod1</i> )                     | NM_131294.1       | sod1-F<br>sod1-R                     | AGGTGACTGGTGAATAACTGG<br>GTCTCACACTATCGGTTGGC         |
| Catalase ( <i>cat</i> )                                   | NM_130912.2       | cat-F<br>cat-R                       | CCAAGGTCTGGTCCCATAAAG<br>GCTCAACCTCCGCGAAATA          |
| $\beta$ - actin                                           | AF025305          | $\beta$ actin- F<br>$\beta$ actin- R | AATCTTGCGGTATCCACGAGACCA<br>TCTCCTTCTGCATCCTGTCAGCAA  |

| Mouse genes                                                   |                |                      |                                                       |
|---------------------------------------------------------------|----------------|----------------------|-------------------------------------------------------|
| Toll-like receptor 4 (Tlr4)                                   | NM_021297.3    | Tlr4-F<br>Tlr4-R     | GCTTACACCACCTCTCAAAC<br>ACAGCCACCAGATTCTTAAAC         |
| Myeloid differentiation primary response gene 88 (Myd88)      | NM_010851.3    | Myd88-F<br>Myd88-R   | TCGATGCCTTTATCTGCTACTG<br>GGTCGGACACACACAACTTA        |
| Interleukin 6, transcript variant 1 (Il 6)                    | NM_031168.2    | Il6-F<br>Il6-R       | CTTCCATCCAGTTGCCTTCT<br>CTCCGACTTGTGAAGTGGTATAG       |
| Interleukin 10 (Il 10)                                        | NM_010548.2    | Il10-F<br>Il10-R     | TTGAATTCCCTGGGTGAGAAAG<br>TCCACTGCCTTGCTCTTATTT       |
| Chemokine (C-X-C motif) ligand transcript variant 2 (Cxcl 12) | NM_013655.4    | Cxcl12-F<br>Cxcl12-R | CTCTGCATCAGTGACGGTAAA<br>CACAGTTTGGAGTGTGAGGA         |
| Chemokine (C-C motif) ligand 3 (Ccl 3)                        | NM_011337.2    | Ccl3-F<br>Ccl3-R     | GAAGATTCCACGCCAATTCATC<br>GATCTGCCGGTTTCTCTTAGTC      |
| Defensin, alpha, 21 (Def 1)                                   | NM_183253.3    | Def1-F<br>Def1-R     | CCAGGGGAAGATGACCAGGCTG<br>TGCAGCGACGATTCTACAAAGGC     |
| Defensin, alpha, related sequence 2 (Def 2)                   | NM_007847.1    | Def 2-F<br>Def 2-R   | GCATGGAATCTGGGTCAAGATAAC<br>AGAAGGAAGAGCAATCAAGGCTAAG |
| Lysozyme 1 (Lyz 1)                                            | NM_013590.4    | Lyz1-F<br>Lyz1-R     | GAAGCACCGACTATGGGATATT<br>GATCCCACAGGCATTCTTAGAT      |
| Mucin 1 (Muc 1)                                               | NM_013605.2    | Muc1-F<br>Muc1-R     | GGCATTCCGGGCTCCTTCTT<br>TGGAGTGGTAGTCGATGCTAAG        |
| Catalase (Cat)                                                | NM_009804.2    | Cat-F<br>Cat-R       | GATGGTAACTGGGATCTTGTTGG<br>GTGGGTTTCTCTTCTGGCTATG     |
| Super oxide dismutase (Sod 1)                                 | NM_131294.1    | Sod1-F<br>Sod1-R     | AGGTGACTGGTAAAATTACTGG<br>GTCTCACACTATCGGTTGGC        |
| Superoxide dismutase 2; mitochondrial (Sod 2)                 | NM_013671.3    | Sod2-F<br>Sod2-R     | AGCGTGACTTTGGGTCITTT<br>AGCGACCTTGCTCCTTATTG          |
| Glyceraldehyde-3-phosphate dehydrogenase (Gapdh)              | NM_001289726.1 | Gapdh-F<br>Gapdh-R   | AGGTCATCCCAGAGCTGAACG<br>CACCTGTGCTGTAGCCGTAT         |

## Supplementary figures

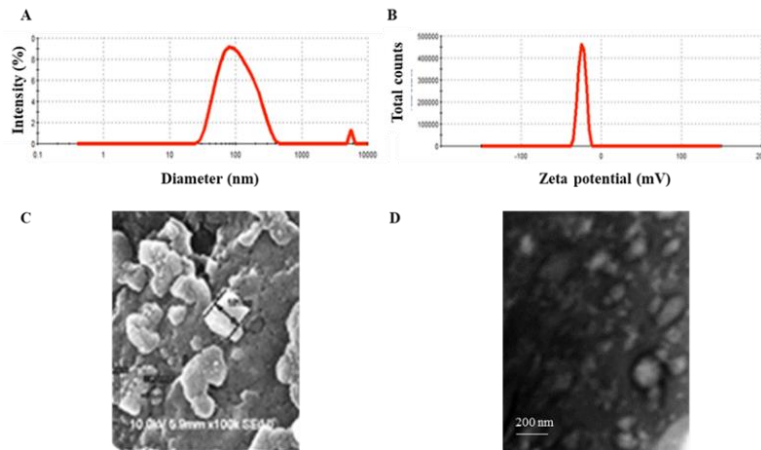

Sup. Fig. 1. Physicochemical properties of SmPNPs. A: size distribution, B: zeta potential. Morphology of SmPNPs under C: field-emission scanning electron microscopy (FE-SEM) and D: field-emission transmission electron microscopy (FE-TEM). FE-SEM and FE-TEM images show the irregular shape of SmPNPs.

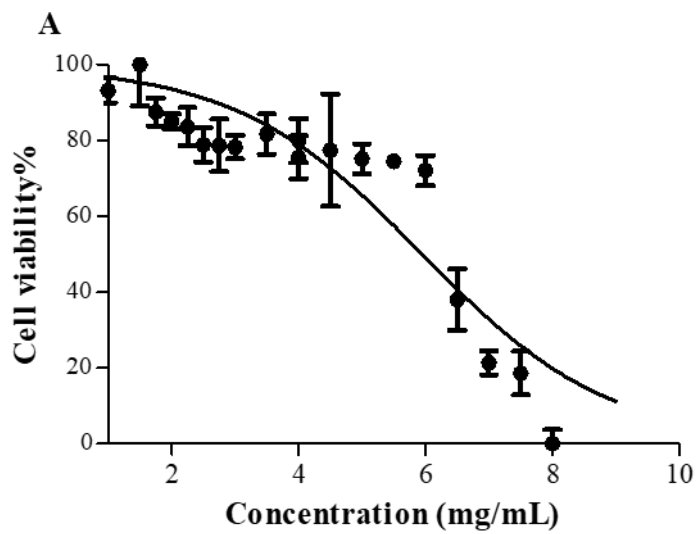

Sup. Fig. 2. *In vitro* cytotoxicity assay of SmPNPs on Raw 264.7. SmPNPs were treated with different concentrations (1-8 mg/mL) of SmPNPs, and cell viability% was evaluated. Values were presented as means plus or minus standard error ( $\pm$  SE) of three independent experiments, and each carried out in triplicates.

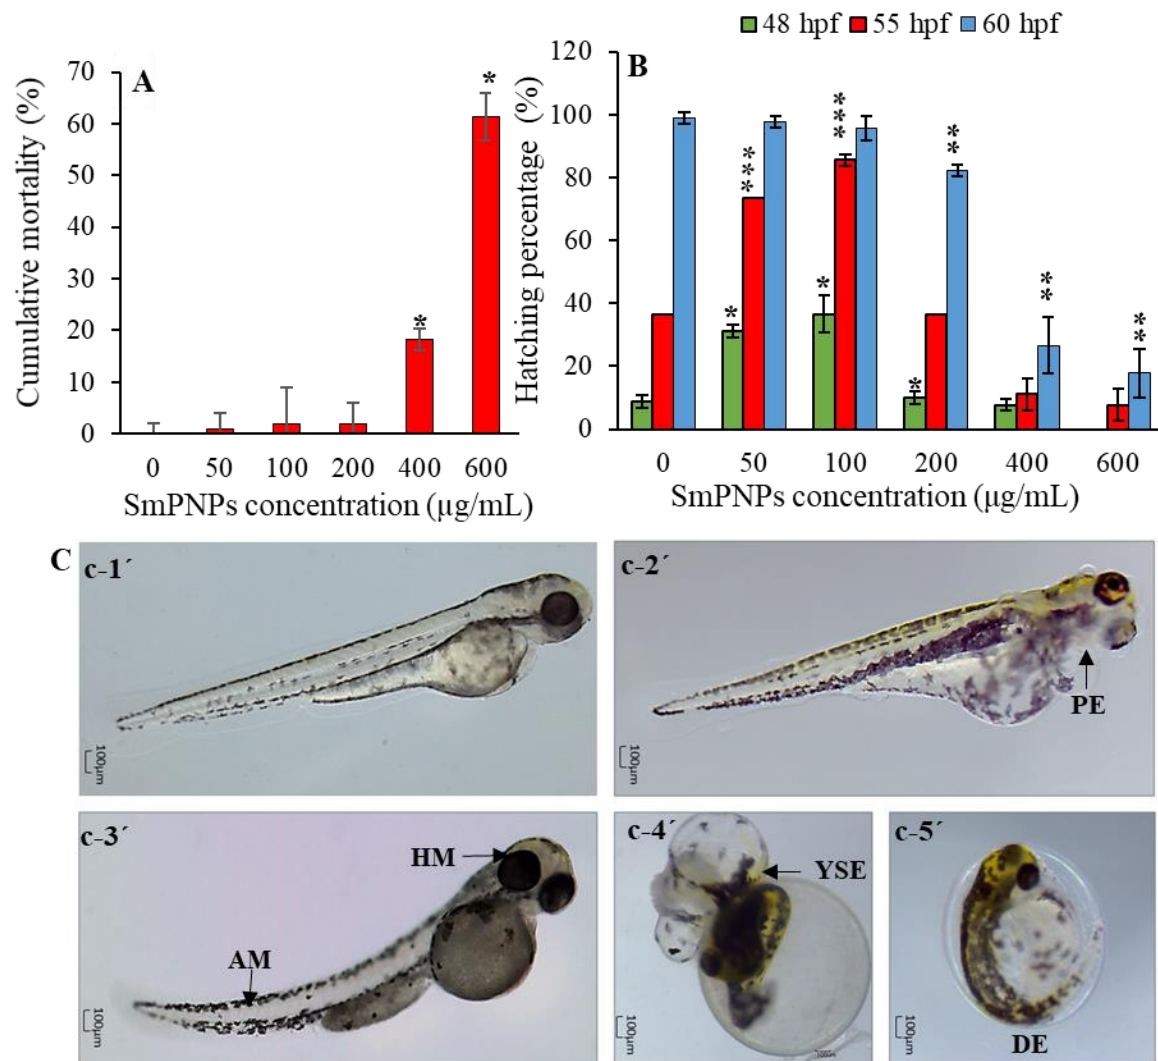

Sup. Fig. 3. *In vivo* toxicity of SmPNPs exposed to zebrafish embryos. A: cumulative mortality, B: hatching rate, C: malformations of embryos induced by SmPNPs, c-1': control larva; c-2': pericardial oedema (PE); c-3': axial malformation (AE) and head malformation (HM); c-4': yolk sack oedema (YSE); c-5': dead embryo (DE). Data are expressed as means plus or minus standard error ( $\pm$  SE) from three independent experiments. Significant differences between experimental groups are denoted by asterisk (\*) marks. (one-way and/or two-way ANOVA \* $P < .05$ , \*\* $P < .01$ , \*\*\* $P < .001$ ).

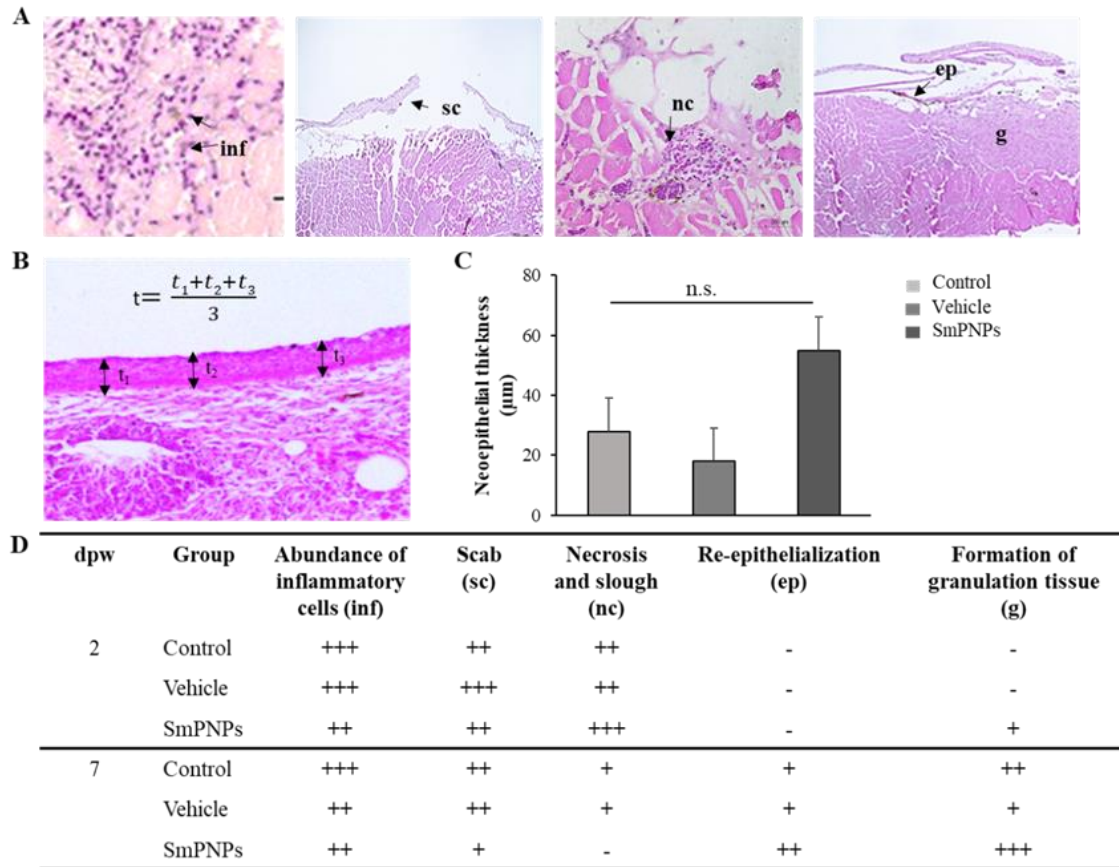

Sup. Fig. 4. Quantitative analysis for major histological parameters in SmPNPs wound healing. A: representative images used for semi-quantitative analysis, B: quantitative analyzed criteria for neoepithelial thickness in healing wounds. C: graphs showing the nonepithelial thickness. The values are the mean  $\pm$  standard deviation (SD) (n=3). Unpaired two-tailed t-test was performed to find statistical significance ( $*P < .05$ ). D: Selected histological indexes demonstrating the diminishing of abundance of inflammatory cells (inf), scab (sc), necrosis and slough (nc), re-epithelialization (ep) and formation of granulation tissue (g) on wound surface at 2 and 7 dpw. (Notes: +, slight; ++, moderate; +++, marked; -, absence).
